# Supplementary material for: A deep learning algorithm to predict risk of pancreatic cancer from disease trajectories
Source: PubMed Central journal article supplement (PMC10202814; doi:10.1038/s41591-023-02332-5), 2023-05-08
Supplement: 41591_2023_2332_MOESM2_ESM.pdf [file 41591_2023_2332_MOESM2_ESM.pdf]

## Reporting Summary

Nature Portfolio wishes to improve the reproducibility of the work that we publish. This form provides structure for consistency and transparency in reporting. For further information on Nature Portfolio policies, see our [Editorial Policies](#) and the [Editorial Policy Checklist](#).

### Statistics

For all statistical analyses, confirm that the following items are present in the figure legend, table legend, main text, or Methods section.

n/a | Confirmed

- The exact sample size ( $n$ ) for each experimental group/condition, given as a discrete number and unit of measurement
- A statement on whether measurements were taken from distinct samples or whether the same sample was measured repeatedly
- The statistical test(s) used AND whether they are one- or two-sided  
*Only common tests should be described solely by name; describe more complex techniques in the Methods section.*
- A description of all covariates tested
- A description of any assumptions or corrections, such as tests of normality and adjustment for multiple comparisons
- A full description of the statistical parameters including central tendency (e.g. means) or other basic estimates (e.g. regression coefficient) AND variation (e.g. standard deviation) or associated estimates of uncertainty (e.g. confidence intervals)
- For null hypothesis testing, the test statistic (e.g.  $F$ ,  $t$ ,  $r$ ) with confidence intervals, effect sizes, degrees of freedom and  $P$  value noted  
*Give  $P$  values as exact values whenever suitable.*
- For Bayesian analysis, information on the choice of priors and Markov chain Monte Carlo settings
- For hierarchical and complex designs, identification of the appropriate level for tests and full reporting of outcomes
- Estimates of effect sizes (e.g. Cohen's  $d$ , Pearson's  $r$ ), indicating how they were calculated

*Our web collection on [statistics for biologists](#) contains articles on many of the points above.*

### Software and code

Policy information about [availability of computer code](#)

Data collection

Data analysis

For manuscripts utilizing custom algorithms or software that are central to the research but not yet described in published literature, software must be made available to editors and reviewers. We strongly encourage code deposition in a community repository (e.g. GitHub). See the Nature Portfolio [guidelines for submitting code & software](#) for further information.

### Data

Policy information about [availability of data](#)

All manuscripts must include a [data availability statement](#). This statement should provide the following information, where applicable:

- Accession codes, unique identifiers, or web links for publicly available datasets
- A description of any restrictions on data availability
- For clinical datasets or third party data, please ensure that the statement adheres to our [policy](#)

Authority (FSEID-00003092 and FSEID-00004491), the Danish Data Protection Agency (ref: SUND-2017-57) and GDPR record of processing activity (ref: 514-0255/18-3000). Application for data access can be made to the Danish Health Data Authority (contact: servicedesk@sundhedsdata.dk). Anyone wishing access to the data and use them for research will be required to meet research credentialing requirements as outlined at the authority's web site: [sundhedsdatastyrelsen.dk/da/english/health\\_data\\_and\\_registers/research\\_services](https://sundhedsdatastyrelsen.dk/da/english/health_data_and_registers/research_services). Requests are normally processed within 3 to 6 months.

Analysis in the US-VA system was conducted under a waiver of informed consent with approval from the VA Boston Healthcare System Institutional Review Board. All VA data used in this study are available to any investigator upon relevant approvals through the VA Informatics and Computing Infrastructure (VINCI) (contact: VINCI@va.gov). Anyone wishing access to the data and use them for research will be required to meet research credentialing requirements as outlined by the VA office of Research and Development, which is expected to get processed at least within a half year.

## Human research participants

Policy information about [studies involving human research participants and Sex and Gender in Research](#).

|                             |                                                                                                                                                                                                                                                                                                                                 |
|-----------------------------|---------------------------------------------------------------------------------------------------------------------------------------------------------------------------------------------------------------------------------------------------------------------------------------------------------------------------------|
| Reporting on sex and gender | Statistics about sex are in Figure 2.                                                                                                                                                                                                                                                                                           |
| Population characteristics  | Statistics about cohorts are in Figure 2.                                                                                                                                                                                                                                                                                       |
| Recruitment                 | There was no recruitment for this study but only access to existing databases. DNPR is a nation-wide registry and therefore includes data on the all patients having residence in Denmark. US-VA dataset includes data from all the veterans who access the veterans facilities.                                                |
| Ethics oversight            | The study has been approved by the Danish Health Data Authority (FSEID-00003092 and FSEID-00004491), the Danish Data Protection Agency (ref: SUND-2017-57) and GDPR record of processing activity (ref: 514-0255/18-3000). The VA Boston Healthcare System obtained internal permission from the Department of Veteran Affairs. |

Note that full information on the approval of the study protocol must also be provided in the manuscript.

## Field-specific reporting

Please select the one below that is the best fit for your research. If you are not sure, read the appropriate sections before making your selection.

Life sciences       Behavioural & social sciences       Ecological, evolutionary & environmental sciences

For a reference copy of the document with all sections, see [nature.com/documents/nr-reporting-summary-flat.pdf](https://nature.com/documents/nr-reporting-summary-flat.pdf)

## Life sciences study design

All studies must disclose on these points even when the disclosure is negative.

|                 |                                                                                                                                                                                                                                                                                                        |
|-----------------|--------------------------------------------------------------------------------------------------------------------------------------------------------------------------------------------------------------------------------------------------------------------------------------------------------|
| Sample size     | No sample size calculation was performed. The maximum number of patients was included in the analysis, after removal of incorrect or uninformative records.<br>DNPR dataset: 6,175,150 patients<br>US-VA dataset: 1,948,209 patients                                                                   |
| Data exclusions | We excluded patients with insufficient followup (< 5 ICD codes), with discontinuous time history or temporary codes.                                                                                                                                                                                   |
| Replication     | The models and hyperparameters were trained repeatedly on training and development sets and then evaluated on strictly withheld test sets, with careful attention to information separation between training and test sets.<br>The model training and evaluation were replicated on the US-VA dataset. |
| Randomization   | Split into train, development and test sets was performed randomly on encrypted patient identifiers.                                                                                                                                                                                                   |
| Blinding        | In this context, random choice of test set is equivalent to blinding.                                                                                                                                                                                                                                  |

## Reporting for specific materials, systems and methods

We require information from authors about some types of materials, experimental systems and methods used in many studies. Here, indicate whether each material, system or method listed is relevant to your study. If you are not sure if a list item applies to your research, read the appropriate section before selecting a response.

## Materials & experimental systems

- | n/a                                 | Included in the study                                  |
|-------------------------------------|--------------------------------------------------------|
| <input checked="" type="checkbox"/> | <input type="checkbox"/> Antibodies                    |
| <input checked="" type="checkbox"/> | <input type="checkbox"/> Eukaryotic cell lines         |
| <input checked="" type="checkbox"/> | <input type="checkbox"/> Palaeontology and archaeology |
| <input checked="" type="checkbox"/> | <input type="checkbox"/> Animals and other organisms   |
| <input checked="" type="checkbox"/> | <input type="checkbox"/> Clinical data                 |
| <input checked="" type="checkbox"/> | <input type="checkbox"/> Dual use research of concern  |

## Methods

- | n/a                                 | Included in the study                           |
|-------------------------------------|-------------------------------------------------|
| <input checked="" type="checkbox"/> | <input type="checkbox"/> ChIP-seq               |
| <input checked="" type="checkbox"/> | <input type="checkbox"/> Flow cytometry         |
| <input checked="" type="checkbox"/> | <input type="checkbox"/> MRI-based neuroimaging |
